# Supplementary material for: Medicaid Behavioral Health Homes: Lessons Learned and Early Findings From Maine
Source: Atypon-hosted journal article supplement (doi:10.1176/appi.ps.201900490), 2020-09-16
Supplement: appi.ps.201900490.ds001.pdf [file appi.ps.201900490.ds001.pdf]

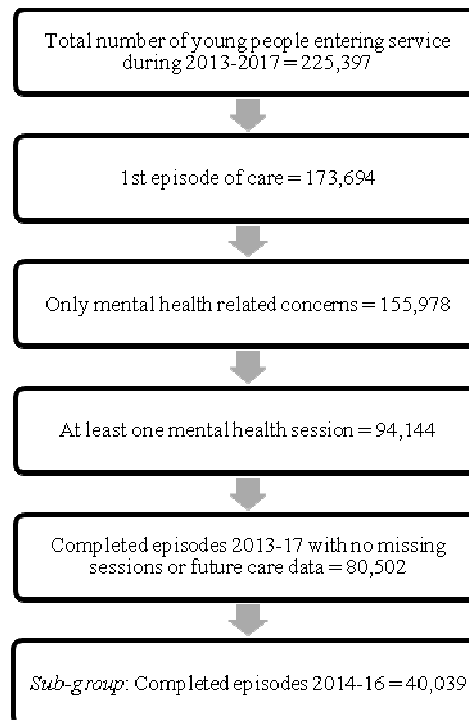

**Supplementary Figure.** Participant flow, cohort selection and data refinement

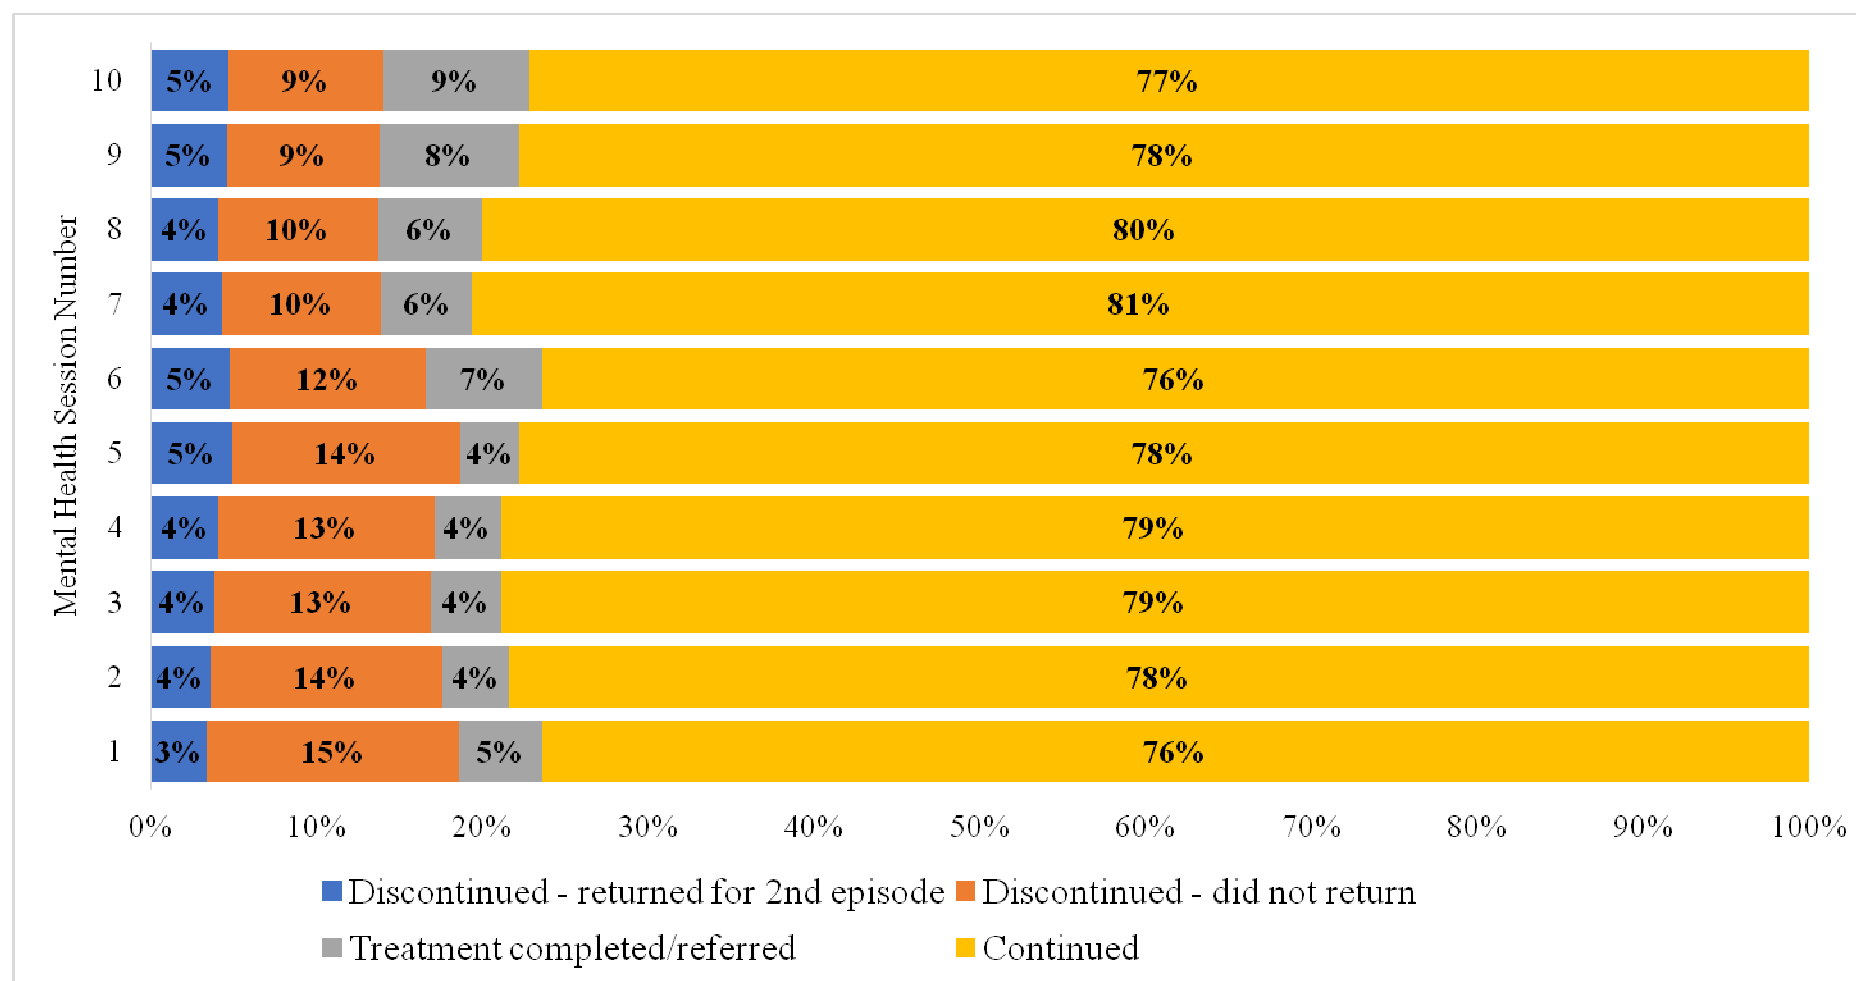

**Supplementary Figure.** Rates of continuation, discontinuation and completion after each session.

Note. Discontinued (return) proportions were projected from sub-group analyses and applied to the overall sample; All % may not sum to 100% due to rounding
